# Supplementary material
Source: Springer Nature journal article supplement (https://www.springermedizin.de/resource/supplementary/40164_2013_65_MOESM9_ESM.pdf/9687108)

R001M

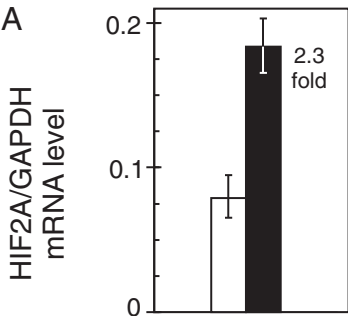

R026M

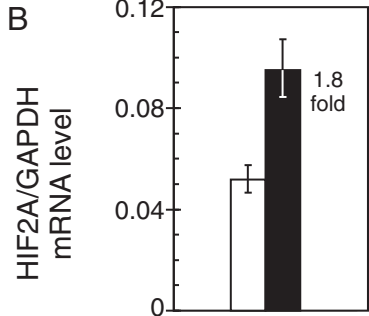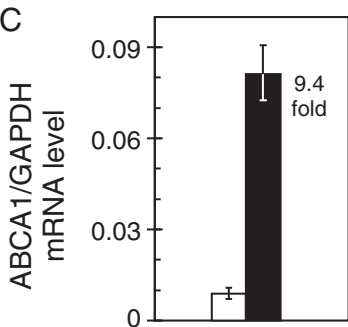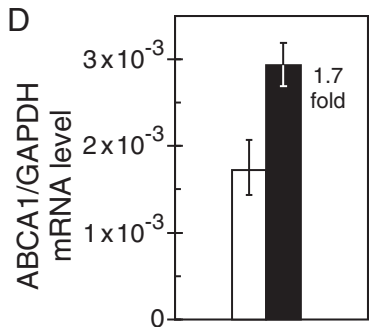

Common Key (all panels):

- Control Cells
- Surviving Cells

Supplement: MOESM9 [file 9687108]
